# Supplementary material for: Mutation in a putative glycosyltransferase-like gene causes programmed cell death and early leaf senescence in rice
Source: PubMed Central journal article supplement (PMC6374497; doi:10.1186/s12284-019-0266-1), 2019-02-13
Supplement: 12284_2019_266_MOESM1_ESM.pdf [file 12284_2019_266_MOESM1_ESM.pdf]

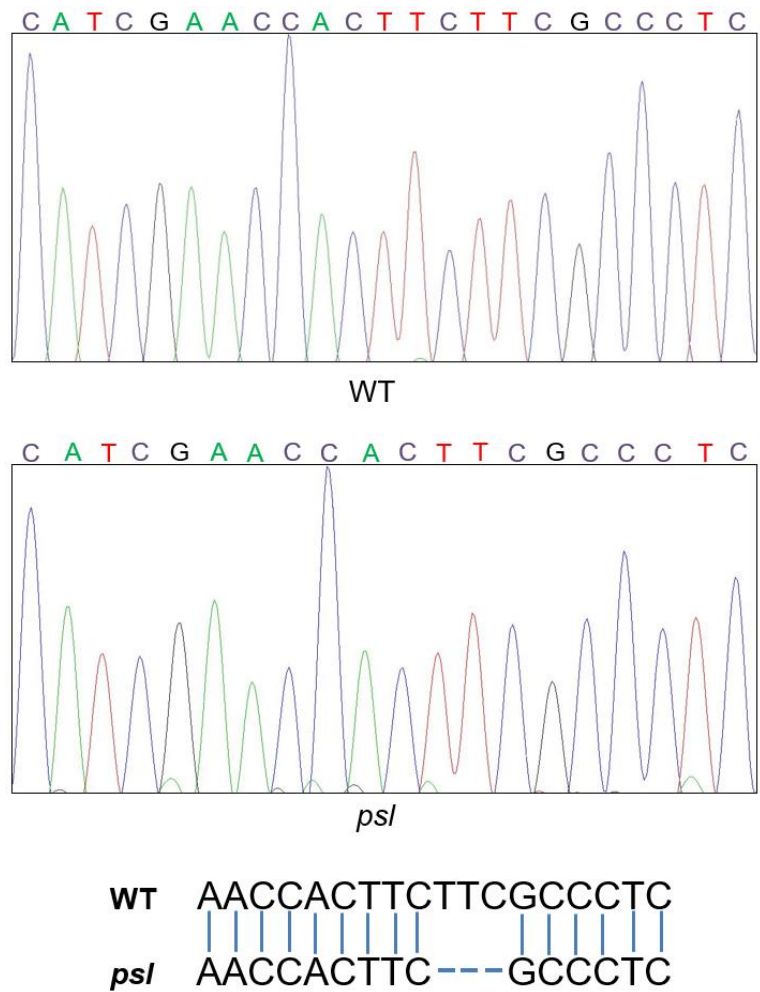

**Figure S1.** Comparison of nucleotide sequences between WT and *psl* mutant. Nucleotide sequence alignment revealed that there was a deletion of 3 bp in the exon of LOC\_Os12g42420 in the *psl*.

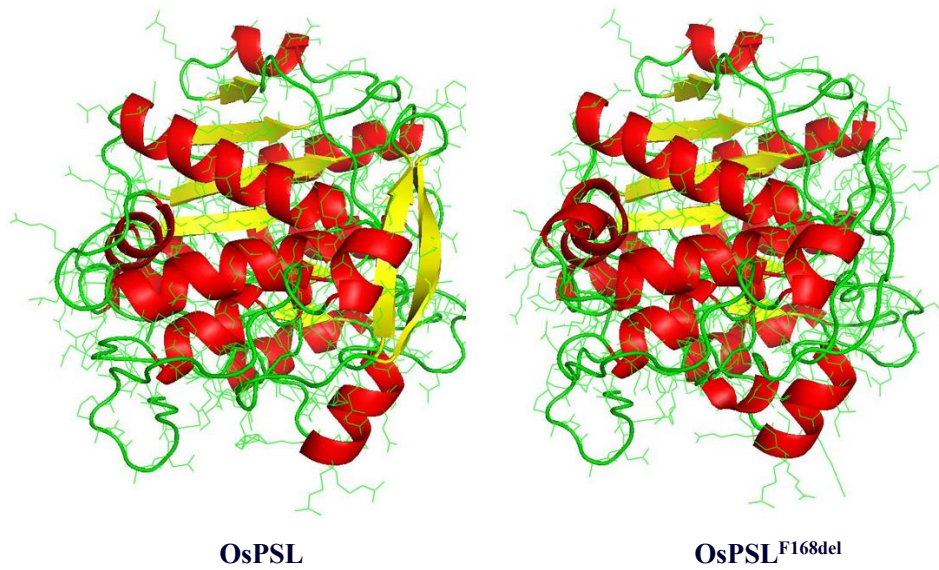

**Figure S2.** Three-dimensional structure prediction of OsPSL protein. The advanced structure of the OsPSL protein was predicted by using Phyre2 server (<http://www.sbg.bio.ic.ac.uk/phyre2>). A phenylalanine residue (F168) is located in a  $\beta$ -sheet and its deletion leads to the absence of the  $\beta$ -sheet in OsPSL protein

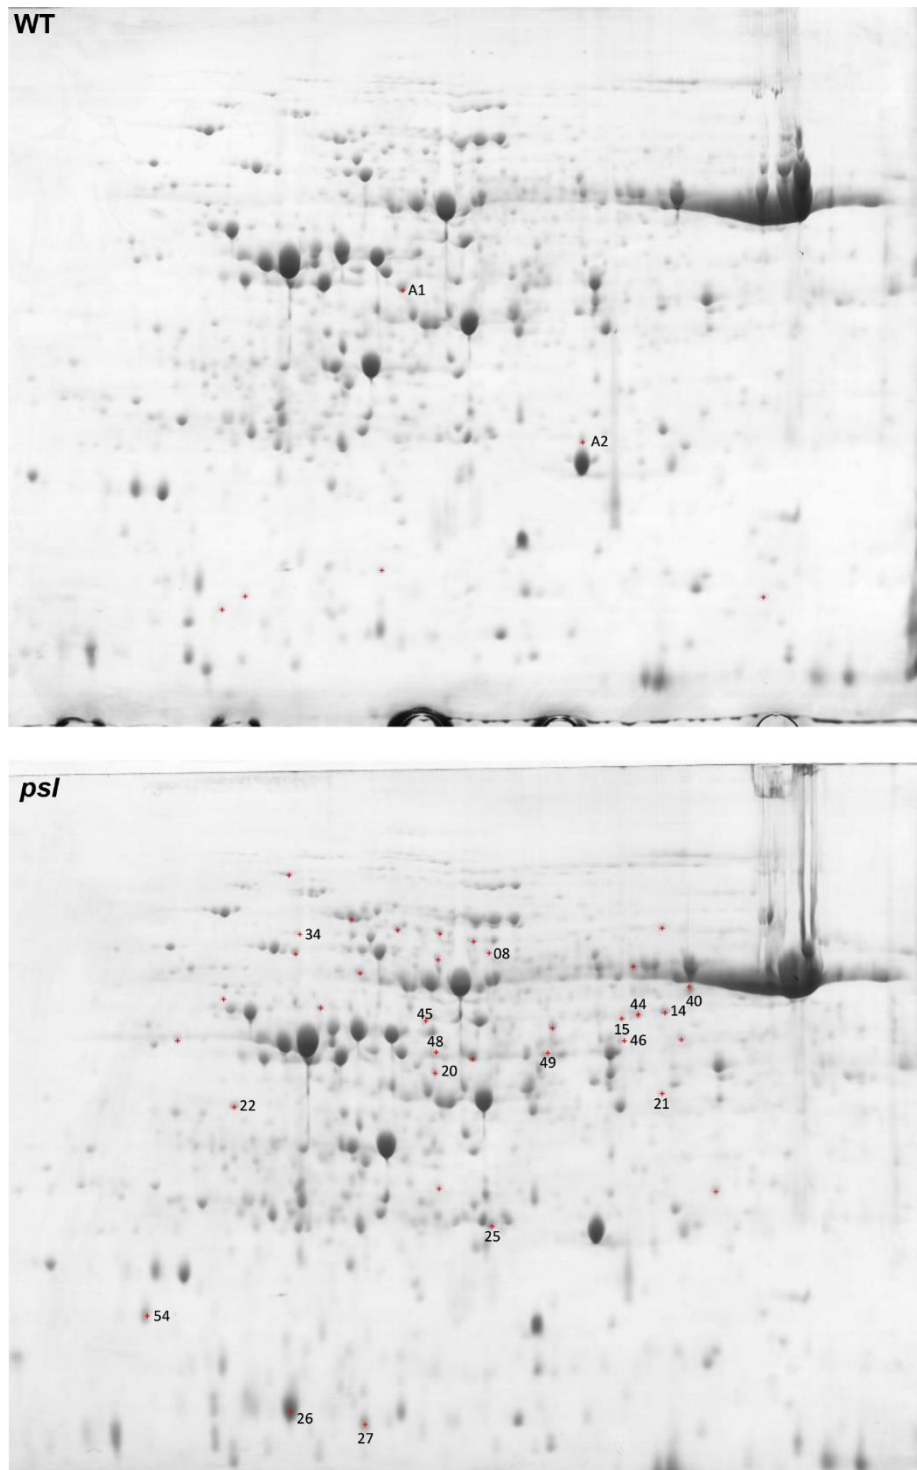

**Figure S3.** Representative 2-D gel protein profiles of leaves from the *psl* mutant and WT. Coomassie blue stained spots were detected by ImageMaster software in the WT and *psl* gel profiles, respectively. Numbered “+” show proteins selected for mass spectrometry.

**Table S1** List of primers used in this study.

| Primers      | Sequence (5'→ 3')        | Locus/Gene    | Experiments       | Marker's type |
|--------------|--------------------------|---------------|-------------------|---------------|
| PSM183F      | GACAAAACCGGCAACAGATT     | Chromosome 12 | Map-based cloning | SSR           |
| PSM183R      | TAGCTTTATTGTGGCAGGGG     | Chromosome 12 | Map-based cloning |               |
| RM247F       | TAGTGCCGATCGATGTAACG     | Chromosome 12 | Map-based cloning | SSR           |
| RM247R       | CATATGGTTTTGACAAAGCG     | Chromosome 12 | Map-based cloning |               |
| PSM419F      | GAGGCAATAGGAGGGGAGA      | Chromosome 12 | Map-based cloning | SSR           |
| PSM419R      | GGCAGCGAAAGCATAAAGTA     | Chromosome 12 | Map-based cloning |               |
| PSM420F      | ACCTATGGCTTGCACGAAC      | Chromosome 12 | Map-based cloning | SSR           |
| PSM420R      | CTGAGTTGACAATATCATCACGGA | Chromosome 12 | Map-based cloning |               |
| PSM421F      | TTGGCGTGCTGCTGTATTTT     | Chromosome 12 | Map-based cloning | SSR           |
| PSM421R      | GTCCCGGATTCATGGTTCTG     | Chromosome 12 | Map-based cloning |               |
| RM519F       | AGAGAGCCCCTAAATTTCCG     | Chromosome 12 | Map-based cloning | SSR           |
| RM519R       | AGGTACGCTCACCTGTGGAC     | Chromosome 12 | Map-based cloning |               |
| PSM464F      | CCGTTCAAATGTTAATGTCCAG   | Chromosome 12 | Map-based cloning | SSR           |
| PSM464R      | GACCAAAGGTGAGACCAATC     | Chromosome 12 | Map-based cloning |               |
| PSM189F      | TGATAGTTGGACCCGATCCT     | Chromosome 12 | Map-based cloning | SSR           |
| PSM189R      | ATCACCCCTCTGCTCGTCT      | Chromosome 12 | Map-based cloning |               |
| RM235F       | AGAAGCTAGGGCTAACGAAC     | Chromosome 12 | Map-based cloning | SSR           |
| RM235R       | TCACCTGGTCAGCCTCTTTC     | Chromosome 12 | Map-based cloning |               |
| PSM192F      | CTGCAGCCCTGTGATAGGAT     | Chromosome 12 | Map-based cloning | SSR           |
| PSM192R      | TGTGCGGTTGCTTTCATAGA     | Chromosome 12 | Map-based cloning |               |
| PSM193F      | CATCGTCCTCGGTATCATCA     | Chromosome 12 | Map-based cloning | SSR           |
| PSM193R      | GTGAAACGGAGGGAGTAGCA     | Chromosome 12 | Map-based cloning |               |
| AL732532-2F  | AACCCACGGGTTTGACTAGC     | Chromosome 12 | Map-based cloning | InDel         |
| AL732532-2R  | GTCTGGTAGCTGGGATCGTG     | Chromosome 12 | Map-based cloning |               |
| BX000457-1F  | CGGATATACACGGCTGCACT     | Chromosome 12 | Map-based cloning | InDel         |
| BX000457-1R  | TGTTAGAAGGGTGCTGAGGC     | Chromosome 12 | Map-based cloning |               |
| AL731885-1F  | CTGTTTGCTCGTTCGTTGGA     | Chromosome 12 | Map-based cloning | InDel         |
| AL731885-1R  | TCGACCCAACCATCACCTG      | Chromosome 12 | Map-based cloning |               |
| AL731885-3F  | AAGTGACAGGAGTGGCATGG     | Chromosome 12 | Map-based cloning | InDel         |
| AL731885-3R  | GGATAGCTTGGTTCGTCCGT     | Chromosome 12 | Map-based cloning |               |
| AL845347-11F | GGTGGCCCATCATGTCAGAG     | Chromosome 12 | Map-based cloning | InDel         |
| AL845347-11R | GCAATGCTAACACCTCGCAT     | Chromosome 12 | Map-based cloning |               |
| AL845347-13F | TGCTAAGGGAGTCAGAACGC     | Chromosome 12 | Map-based cloning | InDel         |
| AL845347-13R | AGATCGGAACACGAAAAG       | Chromosome 12 | Map-based cloning |               |
| AL732532-7F  | TGTGTGCCTTACAGCAGAGG     | Chromosome 12 | Map-based cloning | InDel         |
| AL732532-7R  | TCCCGCTAGAGAGGGTCAC      | Chromosome 12 | Map-based cloning |               |
| AL732532-8F  | ATTTTGCCTCGAATTGGGGC     | Chromosome 12 | Map-based cloning | InDel         |
| AL732532-8R  | TCGCACAAAACCTAGAACCG     | Chromosome 12 | Map-based cloning |               |
| AL732532-5F  | AGCGTGAATAAACACACCCA     | Chromosome 12 | Map-based cloning | InDel         |
| AL732532-5R  | TCTCTCCAGAATCGCTCCA      | Chromosome 12 | Map-based cloning |               |

**Table S1** List of primers used in this study (continued).

| Primers  | Sequence (5'→ 3')                      | Locus/Gene     | Experiments      |
|----------|----------------------------------------|----------------|------------------|
| PSLF     | GGTACCTCTAGAATGGCGCTGCCGCACGC<br>CGCCT | LOC_Os12g42420 | Complement assay |
| PSLR     | ACTAGTCTACCATGGGTCTCGCAGGATGA<br>CGGA  |                | Complement assay |
| PSL-qRTF | CACCCCTTTCCCCACCTTCTACC                | LOC_Os12g42420 | qRT-PCR          |
| PSL-qRTR | GAACCTTGTTCCACAGCCTCCGA                |                | qRT-PCR          |
| SEC1-F   | GAGCACATCAGACGCAGTGC                   | LOC_Os01g68680 | qRT-PCR          |
| SEC1-R   | CCATCTCTTCCCAATTCCA                    |                | qRT-PCR          |
| SEC2-F   | TTCCTGGACACCCCTCTCTG                   | LOC_Os02g28830 | qRT-PCR          |
| SEC2-R   | AATCATCTCTTCCCCTAGCCC                  |                | qRT-PCR          |
| SPY-F    | GAGGCTGGTTGCGAAGTCTG                   | LOC_Os08g44510 | qRT-PCR          |
| SPY-R    | TGCGCCACATGTTTCTGTATG                  |                | qRT-PCR          |
| EIN2F    | TACTGCCTAACTGCGGAGACG                  | LOC_Os07g06130 | qRT-PCR          |
| EIN2R    | CCAGGATGCCCTGAAGACG                    |                | qRT-PCR          |
| EIN3F    | CACGGAGAACAAGCCATCG                    | LOC_Os03g20790 | qRT-PCR          |
| EIN3R    | GCCACTTCCCTGTCCAAAAA                   |                | qRT-PCR          |
| B14F     | ATCAAGCCTGTCAATCCCGA                   | LOC_Os05g04510 | qRT-PCR          |
| B14R     | GAGCTCCCCAGCCACCATA                    |                | qRT-PCR          |
| B15F     | CCATCTTCCACCTCAACCCC                   | LOC_Os01g22010 | qRT-PCR          |
| B15R     | CTGGCGACGATGCTCTTGG                    |                | qRT-PCR          |
| 25SR-F   | AAGCCGAAGAGGAGAAAAGGT                  | 25sRNA         | qRT-PCR          |
| 25SR-R   | TTGGCGGGCCGTTAAGCAGAAAAGA              |                |                  |

**Table S2** Comparisons of agronomic traits between WT and *psl* mutant.

| Trait                 | WT           | <i>psl</i>     |
|-----------------------|--------------|----------------|
| Heading date (d)      | 81.33 ± 0.58 | 81.67 ± 1.02   |
| Seed setting rate (%) | 84.47 ± 3.16 | 79.56 ± 2.58*  |
| 1000-grain weight (g) | 26.52 ± 0.16 | 23.51 ± 0.27** |
| Plant height (cm)     | 86.16 ± 2.02 | 86.07 ± 1.76   |

Asterisks represent significant difference at p-value < 0.05 (\*) or < 0.01 (\*\*).
